# Supplementary material
Source: ML conference proceedings conference paper supplement (https://openaccess.thecvf.com/content/CVPR2024/html/Luo_Physics-Aware_Hand-Object_Interaction_CVPR_2024_paper.html)
Supplement: Supplementary file 1 [file Luo_Physics-Aware_Hand-Object_Interaction_CVPR_2024_supplemental.zip]

Archive with 4 entries (4 files):
- 13276_supp.mov
- __MACOSX/._13276_supp.mov
- 13276_supp.pdf
- __MACOSX/._13276_supp.pdf
